# Supplementary material for: Graphene as a chain extender of polyurethanes for biomedical applications
Source: Royal Society of Chemistry journal article supplement (doi:10.1039/c6ra12792d), 2016-01-01
Supplement: c6ra12792d1.pdf [file c6ra12792d1.pdf]

## Supplementary document

### Graphene as chain extender of polyurethanes for biomedical applications

Dinesh K. Patel<sup>a</sup>, Rajesh K. Singh<sup>b</sup>, Santosh K. Singh<sup>c</sup>, Vinod K. Aswal<sup>d</sup>, Dipak Rana<sup>e</sup>,  
Biswajit Ray<sup>f</sup> and Pralay Maiti<sup>a\*</sup>

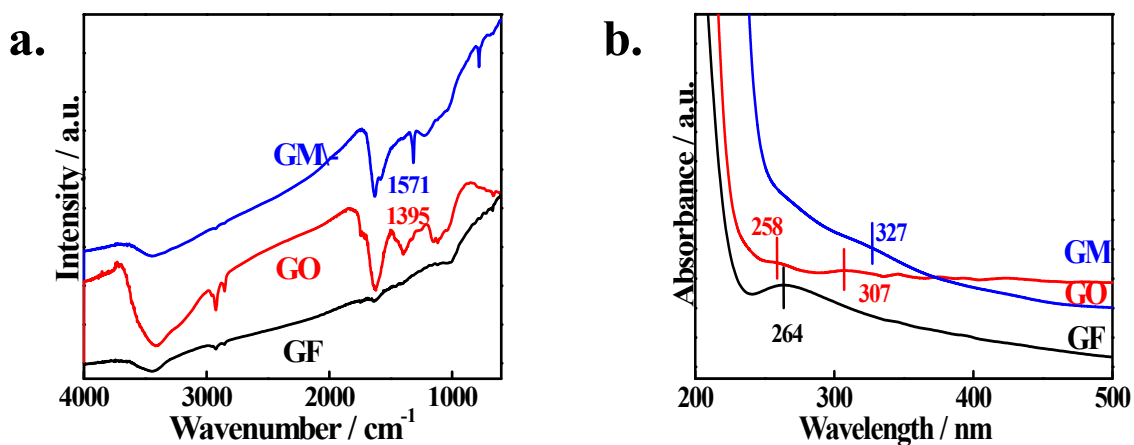

**Figure S1:** FTIR and UV-visible spectra of the graphite, graphene oxide and modified graphene oxide

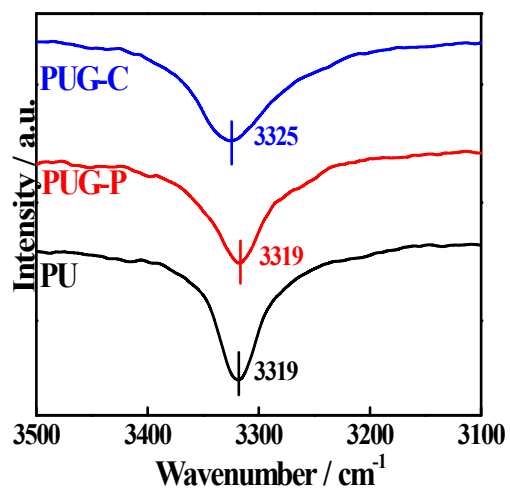

**Figure S2:** FTIR spectra of pure PU and its indicated nanohybrids.

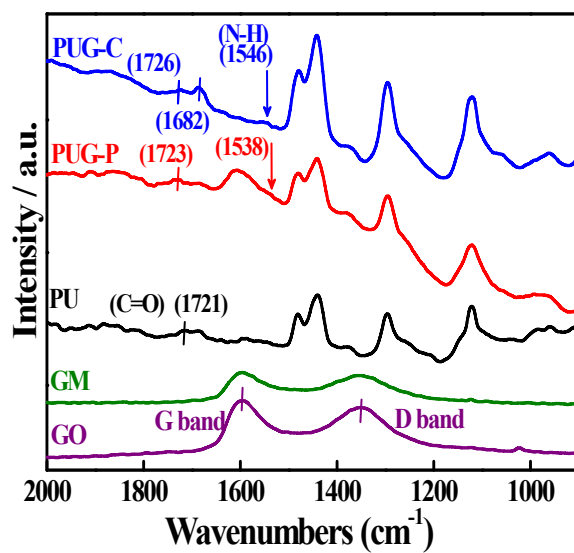

**Figure S3:** Raman characterization of pure PU and its indicated nanohybrids with graphene oxide and modified graphene oxide. Discussion is in the text.

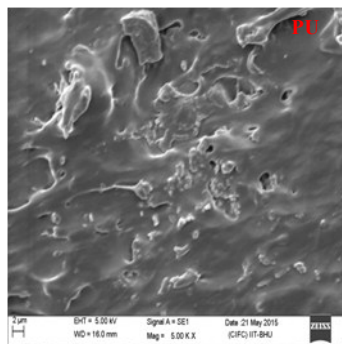

**Figure S4:** SEM image of the pure polyurethane polymer.

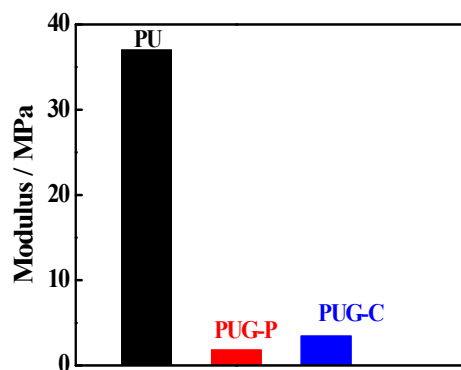

**Figure S5:** Bar diagram to represent the modulus of the pure PU and its indicated nanohybrids.

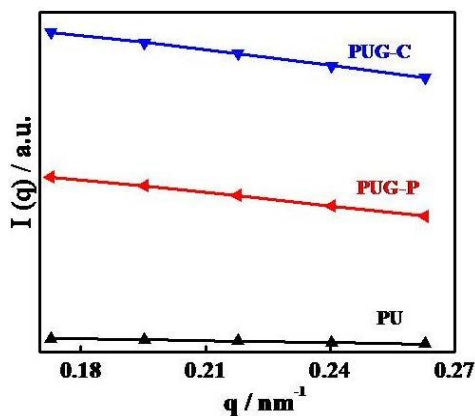

**Figure S6:** Debye-Bueche fitting for calculation of the correlation length.

| Sample | Zero Order      |       | First Order          |       | Higuchi         |       | Korsmeyer-Peppas |       |
|--------|-----------------|-------|----------------------|-------|-----------------|-------|------------------|-------|
|        | $k$             | $r^2$ | $k$                  | $r^2$ | $k$             | $r^2$ | $n$              | $r^2$ |
| PU     | $0.61 \pm 0.03$ | 0.995 | $0.003 \pm 0.00013$  | 0.991 | $3.95 \pm 0.11$ | 0.993 | $0.54 \pm 0.01$  | 0.998 |
| PUG-P  | $0.57 \pm 0.04$ | 0.992 | $0.0033 \pm 0.00012$ | 0.990 | $3.72 \pm 0.06$ | 0.994 | $0.70 \pm 0.03$  | 0.996 |
| PUG-C  | $0.50 \pm 0.02$ | 0.990 | $0.0024 \pm 0.0001$  | 0.994 | $3.2 \pm 0.07$  | 0.991 | $0.72 \pm 0.01$  | 0.999 |

**Table S1:** Release rate constant ( $k$ ), correlation coefficient ( $r^2$ ) and diffusion release exponent ( $n$ ) obtained using different mathematical models for drug loaded PU and its indicated nanohybrids
